# 1 Hydroxychloroquine plus azithromycin: a potential interest in reducing in- 2 hospital morbidity due to COVID-19 pneumonia (HI-ZY-COVID)?

3 Benjamin Davido<sup>1,§</sup>, Thibaud Lansaman<sup>2</sup>, Simon Bessis<sup>1</sup>, Christine Lawrence<sup>3</sup>, Jean-  
4 Claude Alvarez<sup>4</sup>, Hélène Mascitti<sup>1</sup>, Frédérique Bouchand<sup>5</sup>, Pierre Moine<sup>6</sup>, Véronique  
5 Perronne<sup>1</sup>, Aurélie Le Gal<sup>1</sup>, Djillali Annane<sup>6</sup>, Christian Perronne<sup>1</sup>, Pierre De Truchis<sup>1,§</sup>,  
6 on behalf of the COVID-19 RPC Team\*

7 <sup>1</sup> Maladies Infectieuses, Université Paris-Saclay, AP-HP Hôpital Raymond Poincaré,  
8 Garches, France

9 <sup>2</sup> Rééducation fonctionnelle, Université Paris-Saclay, AP-HP Hôpital Raymond  
10 Poincaré, Garches, France

11 <sup>3</sup> EOH, Université Paris-Saclay, AP-HP Hôpital Raymond Poincaré, Garches, France

12 <sup>4</sup> Pharmaco-toxicologie, Université Paris-Saclay, AP-HP Hôpital Raymond Poincaré,  
13 Garches, France

14 <sup>5</sup> Pharmacie Hospitalière, Université Paris-Saclay, AP-HP Hôpital Raymond  
15 Poincaré, Garches, France

16 <sup>6</sup> Réanimation médicale, Université Paris-Saclay, AP-HP Hôpital Raymond Poincaré,  
17 Garches, France

18 §: Both authors contributed equally to this work.

19

20 **Keywords:** hydroxychloroquine, azithromycin, Covid-19, pneumonia

21 **Financial Disclosure:** The authors have no financial relationships relevant to this  
22 article to disclose.

23 **Conflict of interest statement:** The authors have no specific conflict of interest.

24

25 **Corresponding author:**

26 Benjamin Davido, Service de Maladies Infectieuses et Tropicales

27 Hôpital Raymond-Poincaré, Garches 92380, France.

28 Tel: +33-1-47107758, e-mail: [benjamin.davido@aphp.fr](mailto:benjamin.davido@aphp.fr)

29

30 Abstract word count: 220/250

31 Body of text word count: 2100 words

32

33

34

35

36

37

38

39

40

41

42

43

44

45

46

47

## 48 **Abstract:**

49 Introduction: Hydroxychloroquine (HCQ) with or without azithromycin is currently still  
50 debated as a potential treatment for the COVID-19 epidemic. Some studies showed  
51 discrepant results. However, timing for the treatment initiation and its setting (in-  
52 hospital or out-patient) are not consistent across studies.

53 Methods: Monocentric retrospective study conducted from 2th March to 17th April  
54 2020, in adults hospitalized in a tertiary hospital for COVID-19. Patients  
55 characteristics were compared between groups depending on the therapy received  
56 (HCQ/azithromycin taken  $\geq 48$  hours or other treatment). Outcomes were evaluated  
57 from admission, by the need for intensive care unit (ICU) support and/or death.  
58 Univariate analyses were performed using non-parametric tests and confirmed by a  
59 multiple logistic regression using Pearson correlation test.

60 Results: Among 132 patients admitted for COVID-19 in the medicine ward, 45  
61 received HCQ/azithromycin  $\geq 48$  hours, with a favorable outcome in 91.1% of cases  
62 (OR=6.2,  $p=0.002$ ) versus others regimen ( $n=87$ ). Groups were comparable at the  
63 baseline in terms of age, sex, comorbidities, extend in thoracic imaging, and severity.

64 Among patients that required to be transferred to ICU ( $n=27$ ) (for mechanical  
65 ventilation), median delay for transfer was 2 days (IQR 1-3). We report only 1 patient  
66 that presented an adverse event (a prolonged QT interval on EKG) that required to  
67 discontinue HCQ.

68 Conclusion: The present study suggests a potential interest of the combination  
69 therapy using HCQ/azithromycin for the treatment of COVID-19 in in-hospital  
70 patients.

71

## 72 **Introduction:**

73 Hydroxychloroquine (HCQ) is currently still debated as a potential treatment for the  
74 COVID-19 epidemic. In France, Gautret *et al.* [1,2] and Million *et al.* [3] showed in  
75 Marseille that a combination therapy using HCQ and azithromycin could potentially  
76 reduce viral shedding and locally flatten the epidemic curve by reducing the number  
77 of pneumonias associated with COVID-19. Although these studies are of interest  
78 considering the sample size ( $n > 1000$ ) they are partly conducted on outpatients and  
79 do lack a control group without HCQ and azithromycin.

80 Concomitantly, a study conducted by Mahevas *et al.* [4] decided to evaluate HCQ  
81 alone (600 mg per day) prescribed in an in-hospital setting within 48 hours after  
82 admission ( $n = 84$ ) in comparison to standard of care, and showed no difference  
83 between groups assessed by a transfer in intensive care unit (ICU) and/or death.  
84 Those findings are concordant with a recent publication issued in United States by  
85 Magagnoli *et al.* [5] despite some bias at baseline.

86 More, recently Esper *et al.* [6] in Brazil reported a potential interest of HCQ (using a  
87 loading dose of 800 mg followed by 600 mg during 6 days) plus azithromycin in the  
88 prevention of hospital admission in patients presenting compatible symptoms of  
89 COVID-19 (a 2.8-fold decrease if HCQ was administered within the first 7 days of  
90 symptoms).

91 To our knowledge, at the time being, there is no study evaluating the interest of an  
92 administration of HCQ plus azithromycin during at least 48 hours in an in-hospital  
93 setting and its impact on the admission in intensive care unit (ICU). Since the 25<sup>th</sup> of  
94 March 2020 in France, in the context of the state of health emergency, the ministerial

95 decree #2020-314 authorized the in-hospital prescription of HCQ for COVID-19  
96 patients. Therefore, we decided to report our own experience of this regimen in order  
97 to draw conclusions whether we pursue such combination therapy for hospitalized  
98 patients.

99

## 100 **Methods:**

### 101 *Setting*

102 We conducted a monocentric and retrospective study, from 2th March 2020 to 17th  
103 April 2020, regarding adults admitted in our medicine wards in a tertiary university  
104 hospital namely Hôpital Raymond Poincaré (AP-HP), Garches, France. For decades,  
105 this hospital, and particularly the ICU, is specialized in the management of  
106 neurological impairment and infectious diseases. Since the beginning of the COVID-  
107 19 outbreak, an entire building, namely Widal (in honor of Doctor Fernand Widal),  
108 was entirely dedicated to admit only COVID-19 positive patients. During the peak of  
109 the epidemic, we had a maximum capacity of 85 beds for medicine and 32 beds for  
110 ICU.

111 We included all the adults admitted in medicine for a COVID-19 infection confirmed  
112 by SARS-CoV-2 PCR and/or a compatible pulmonary CT-scan. Exclusion criteria  
113 were i) patients discharged from ICU to a medicine ward; ii) opposition to collect data  
114 expressed by the patient.

115

### 116 *Data collection*

The following data were collected from patient's medical charts:

- Patient characteristics: age, sex, diabetes, cardiovascular risk factor, smoking habits, obesity, chronic pulmonary disease, Charlson comorbidity score,
- Infection characteristics: delay between onset of symptoms and admission, presence of super-infection, C-reactive protein (CRP) and white blood cell count (WBC) at admission, percentage of lung injuries on CT-scan if applicable, positive PCR amplifying the betacoronavirus E gene and the SARS-CoV-2 RdRp gene on nasopharyngeal swab or sputum,
- Treatment characteristics: requiring ICU support with invasive ventilation, associated therapeutic strategies (especially HCQ and azithomycin),
- Unfavorable outcome was evaluated after admission, by the need for ICU support and/or death,
- The patients were followed-up until hospital discharge.

### *Treatment strategies*

All patients under oxygen received systematically a beta-lactam for at least 5 days, using preferentially ceftriaxone to treat a potential super-infection.

Patients were eligible to a targeted therapy against COVID-19 considering the following indications: i) patient presenting a clinical pneumonia confirmed by SARS-CoV-2 PCR requiring oxygen therapy (independently of the CT scan findings); ii) high suspicion of COVID-19 pneumonia considering the clinical presentation and

confirmed by a pulmonary CT-scan showing ground-glass opacity affecting  $\geq 10\%$  of the whole parenchyma

Before HCQ initiation, patients had systematically an EKG to evaluate the corrected QT interval using the Framingham formula, and monitored 2 times per week during 10 days. A loading dose at day 1 with 800 mg/day was administered followed by a maintenance dose of 400 mg/day up to 600 mg/day in case of obesity (body mass index (BMI)  $> 30$ ) for a total 10 days. In addition, 500 mg of azithromycin was prescribed the first day, followed by 250 mg for 4 days. Patients were informed that HCQ is currently off-label for the treatment of COVID-19. In case they refused the prescription of HCQ or the latter was contraindicated, it was noted into their medical chart and patients were eligible for other therapeutic strategies.

Primary objective was to evaluate whether HCQ plus azithromycin (HI-ZY-COVID) initiated after their admission was associated with a favorable outcome. For analysis purposes, we stated that patients should receive at least 48 hours of the above combination therapy to be considered effective. Therefore, patients were divided into 2 groups: the ones who received specifically HCQ/azithromycin for 48 hours or more and the remaining.

### *Statistical analysis*

Quantitative variables were expressed using mean and standard deviation or median and interquartile range (IQR) when appropriate. Qualitative variables were described by percentage. Comparisons were performed using non-parametric tests with a Yates' continuity corrected chi-square test for qualitative variables and a Mann-Whitney test for quantitative variables. Multiple logistic regression test was performed

using Pearson correlation test. Analyses were performed using GraphPad Prism v.8.3.1 (GraphPad Software Inc., La Jolla, CA). Statistical significance was defined for  $p \leq 0.05$ .

### *Compliance with Ethical Standards*

All procedures performed in studies involving human participants were in accordance with the ethical standards of the institutional and/or national research committee and with the 1964 Helsinki Declaration and its later amendments or comparable ethical standards. This cohort is registered on ClinicalTrials.gov (NCT04364698). The study was approved by the local Ethics Committee. As data used in the study were anonymous and retrospective, the requirement for informed consent was waived by the Ethics Committee.

### **Results:**

Overall 132 were eligible for the analysis (see flowchart in Figure 1). Forty-five patients received HCQ plus azithromycin for more than 48 hours after admission. The remaining patients (n=87) were in the others regimen group. Of note, in patients who did not receive HCQ, 5 had cardiac contraindication and 2 refused to be treated with this molecule.

Patient characteristics between HCQ/azithromycin  $\geq 48$  hours and the no-HCQ/azithromycin (control group) were comparable and are detailed in Table 1. It should be noted that patients receiving HCQ/azithromycin had higher need for oxygen and higher CRP level at admission than the control group.



For analysis purposes the cohort was divided according to the outcome into 2 groups: “favorable outcome” and “unfavorable outcome” (ICU and/or death). Main findings are summarized in Table 2. Well-known comorbidities in COVID-19 (cardiovascular, respiratory, diabetes, immune deficiency, obesity) that were similar at baseline were not associated with the outcome ( $p>0.2$ ). During the course of HCQ/azithromycin, we report only 1 patient that presented an adverse event (a prolonged QT interval on EKG) without clinical event that required to discontinue HCQ before 48h, and was therefore placed in the azithromycin group.

Among patients that required to be transferred to ICU ( $n=27$ ) (for mechanical ventilation), median delay for transfer was 2 (1-3) days. Up to this day, 10 (37%) patients died in ICU and 2 in medical ward.

For clarification, outcomes according to therapeutic strategy are illustrated in Figure 2.

Multiple logistic regression confirmed that a favorable outcome was associated with receiving HCQ plus azithromycin ( $p=0.009$ ), oxygen flow ( $p<0.0001$ ), lymphocyte count ( $p=0.002$ ) and CRP ( $p=0.002$ ) detailed in Figure 3.

## **Discussion:**

Our study supports that in-hospital patients treated with HCQ plus azithromycin for more than 48 hours, have a reduced risk to be transferred to ICU and/or to decease (OR=6.2).

Our findings are concordant with Gautret *et al.* [1,2] who revealed good clinical and virologic outcomes using this combination therapy, in the limit of the absence of a

control group in his study conducted especially among ambulatory care patients. Furthermore, Esper *et al.* [6] reported efficacy of the combination therapy of HCQ/azithromycin in outpatients exclusively. The main limit of this study is the lack of PCR testing, despite the fact the majority of patients included in the HCQ/azithromycin arm had a high rate of CT-scan lung injuries compatible with COVID-19.

To support our results, we ensured that the difference accounting for the HCQ/azithromycin arm was not associated with an earlier initiation of treatment (see Table 1). Interestingly, despite the fact HCQ was initiated after a median delay of 9 days from onset of symptoms, period approaching the so-called “cytokine storm” [7,8], we can hypothesize that HCQ might have played a role in the second stage of the disease as an immune-modulator as previously described [9].

Mahevas *et al.* [4] studied patients hospitalized for COVID-19 as we did and showed no evidence of clinical efficacy of HCQ alone (n=84) in a retrospective and comparative study. However, we have no information if patients categorized as control group received azithromycin or a symptomatic treatment. These results’ discrepancies in comparison to our findings should be discussed. First, we used a combination therapy with HCQ plus azithromycin and second our patients were considered to be treated efficiently only if they received a course of at least 48 hours of this combination therapy. However, Magagnoli *et al.* [5] reported, in 368 hospitalized veterans with COVID-19, a higher death rate with HCQ treatment with or without azithromycin. This study has numerous bias, including a higher lymphocytopenia ( $<500/\text{mm}^3$ ) and more comorbidities at baseline in the patients who received HCQ, a population exclusively composed of male, including 66% of black

Americans. Also, the posology of HCQ is lacking and 31% had azithromycin in the control group.

Our findings are all the more remarkable, considering that patients in the HCQ/azithromycin group required significantly more oxygen ( $p=0.005$ ) and had higher CRP ( $p=0.008$ ) at baseline, which is deemed to be a predictive factor of severity in COVID-19 pneumonia [10]. Of note, in multivariate analysis our patients in ICU had lower lymphocyte count and higher CRP level ( $p=0.002$ ) as commonly described [11].

Interestingly, patients who received azithromycin alone had a trend to a better outcome than standard of care (multivariate analysis,  $p=0.05$ ), in the limit of the sample size ( $n<30$ ). Azithromycin's potential antiviral activity is concordant with previous *in vitro* studies regarding SARS-CoV-2 [12] or H1N1-pdm09 [13] and one clinical randomized trial in the prevention of children respiratory infections [14]. As azithromycin is commonly prescribed and authorized in ambulatory care, a study conducted among general practitioners could be relevant to evaluate this single therapy for the control of COVID-19 in outpatients.

In addition, our experience confirms the safety of HCQ, without any serious side effect, as long as we take the necessary caution at the initiation of therapy and during follow-up EKG. This low risk of toxicity using a conventional dose of HCQ associated with azithromycin is concordant with Borba *et al.* [15].

Finally, we believe the combination using HCQ plus azithromycin is relatively cost-effectiveness and makes it particularly attractive to better control the hospital overflow during the pandemic.

However, our study has several limitations. First, it is a retrospective study with a limited sample size (n=132), with a pre-established statement that considered HCQ plus azithromycin had to be received for at least 48 hours to interpret its impact. Second, groups were not balanced in terms of individuals notably because prior to the 25<sup>th</sup> of march, HCQ was not authorized by the French Minister for Solidarity and Health and drug was therefore out of stock. Third, we performed less frequently lung CT-scans in the no-HCQ/azithromycin group, partly because CT-scans were not recommended for COVID-19 at the beginning of the outbreak in our hospital (in early March). Also, in our ICU critical care physicians do not systematically perform CT-scans in intubated patients considering the higher risk of contamination from those patients. Fourth, as we are facing a recent outbreak of COVID-19 in France where knowledge and criteria of ICU transfer might have changed over time and considering prolonged length of stay in ICU [16], the overall mortality might have been underestimated, as (n=6/29) are still under mechanical ventilation assistance. Finally, we can discuss our decision not to exclude patients receiving lopinavir from the control group (n=14), however there is currently no solid data supporting its efficacy against SARS-CoV-2 [17].

In conclusion, our study confirms already known risk factors for unfavorable outcomes in COVID-19 hospitalized patients. Moreover, the present work highlights the potential interest of the combination therapy of HCQ/azithromycin ( $\geq 48$  hours' intake) by limiting the rate of ICU transfer. A larger and randomized controlled study is necessary to confirm those preliminary findings. Our data constitute a hope to flatten the epidemic curve and prevent ICU overflow in case of a possible second wave.

**Figure 1:** Flowchart of the studied population.

**Figure 2:** Outcome pictured depending on the received therapeutic strategy. HCQ = hydroxychloroquine; AZI = azithromycin; SOC = standard of care which includes no targeted therapy, or lopinavir/r or treatment received <48h until unfavorable outcome (transfer to ICU or death).

**Figure 3:** Factors influencing the outcome in a multiple logistic regression using a Pearson correlation test. Coefficient values can range from +1 to -1, where +1 indicates a perfect positive relationship, -1 indicates a perfect negative relationship, and a 0 indicates no relationship exists. HCQ = hydroxychloroquine; AZI = azithromycin; SOC = standard of care which includes no targeted therapy, or lopinavir/r or treatment received <48h until unfavorable outcome (transfer to ICU or death).

## Acknowledgments:

First author (BD) would like to thank Azzam Saleh-Mghir for his unfailing support.

## Contributors' Statement:

BD and PDT conceptualized and designed the study, carried out the initial analyses, coordinated and supervised data collection, drafted the initial manuscript, and reviewed and revised the manuscript.

BD, SB, TL, CP designed the data collection instruments, collected data and PDT and AD reviewed and revised the manuscript.

All authors approved the final manuscript as submitted and agree to be accountable for all aspects of the work in ensuring that questions related to the accuracy or integrity of any part of the work are appropriately investigated and resolved.

## List of Collaborators

### *\*COVID-19 RPC Team*

#### Department of Intensive Care

Djillali Annane, MD, PhD (1,2,5)  
[Xavier Ambrosi, MD \(4\)](#)  
 Suzanne Amthor, MD (1)  
 Rania Bounab, MD (1,2)  
 Ryme Chentouh, MD (1)  
 Bernard Clair, MD (1)  
 Abdallah Fayssol, MD (1,2,5)  
 Diane Friedman, MD (1)  
 Nicholas Heming, MD, PhD (1,2,5)  
 Virginie Maxime, MD, (1)  
 Pierre Moine, MD, PhD (1,2,5)  
 Myriam Niel Duriez, MD (1)  
 David Orlikowski, MD, PhD (1,2,5,8)  
 Francesca Santi, MD (1,2)

#### Pharmacy

Frédérique Bouchand, PharmD (1)  
 Muriel Farcy-Afif, PharmD (1)  
 Hugues Michelon, PharmD, MSc (1)  
 Maryvonne Villart, PharmD (1)

#### Research Staff

Isabelle Bossard (8)  
 Tiphaine Barbarin Nicolier (1)  
 Stanislas Grassin Delyle, MCUPH (2,3,5)  
 Elodie Lamy (2,5)  
 Camille Roquencourt, MD (5)  
 Gabriel Saffroy (2)  
 Etienne Thevenot (5)

# Department of Intensive Care Interns

Baptiste Abbar (1)  
 Steven Bennington (1)  
 Julia Dray (1)  
 Pierre Gay (1)  
 Elias Kochbati (1)  
 Majstor Luxman (1)  
 Myriam Moucachen (1)  
 Alice Pascual (1)  
 Juan Tamayo (1)  
 Justine Zini (1)

# Department of Anesthesia, Perioperative Care, and Pain

Marie Boutros, MD (1)  
 Anne Lyse Bron, MD (11)  
 Denys Coester, MD (12)  
 Etienne Defouchecour, MD (11)  
 Brigitte Dosne Blachier, MD (11)  
 Léa Guichard, MD (1)  
 Damien Hamon Pietrin, MD, PhD (1)  
 Hakim Khiter, MD (1)  
 Valéria Martinez, MD, PhD (1,2,6)  
 Simone Meuleye, MD (1)  
 Suzanne Reys, MD (1)  
 Sebastien Schitter, MD (1)  
 Chawki Trabelsi, MD (1)

# Pediatric Critical Care Unit

Helge Amthor, MD, PhD (1,2,7)  
 Jean Bergounioux MD (1,2,5)  
 Maud Guillon, MD (1)  
 Amal Omar, MD (1)

# Laboratory of Physiology

Frédéric Lofaso, MD, PhD (1,2,7,10)  
 Helene Prigent, MD, PhD (1,2,7,10)

# Department of Rehabilitation and Physical Medicine

Djamel Bensmail, MD, PhD (1,2,7,10)  
 Pierre Denys, MD, PhD (1,2,7,10)  
 Charles Joussain, MD, PhD (1)  
 Lauren Kagane, MD (1)  
 Thibaut Lansaman, MD (1)  
 Hélène Le Liepvre, MD (1)  
 Antoine Leotard, MD, MS (1)  
 Jonathan Levy, MD, MS (1,2,7,10)  
 Claire Malot, MD (1)

388 Julie Paquereau, MD (1)  
389 Celia Rech, MD (1)  
390  
391 Department of Rehabilitation Interns  
392 Florence Angioni (1)  
393 Elsa Chkron (1)  
394 Céline Karabulut (1)  
395 Jérôme Lemoine (1)  
396 Noémie Trystram (1)  
397 Julien Vibert (1)  
398  
399 Department of Infectious Diseases  
400 Simon Bessis, MD (1,2)  
401 Pascal Crenn, MD, PhD (1,2,7)  
402 Benjamin Davido, MD, MS (1)  
403 Aurélien Dinh, MD, MS (1,2)  
404 Stéphanie Landowski, MD (1)  
405 Hélène Mascitti, MD, MS (1)  
406 Morgan Matt, MD (1,2)  
407 Christian Perronne, MD, PhD (1,2)  
408 Véronique Perronne, MD (1)  
409 Soline Simeon, MD, MS (1)  
410 Pierre de Truchis, MD, MS (1)  
411  
412 Department of Infectious Diseases Interns  
413 Marc Hobeika (1)  
414 Louis Jacob (1)  
415 Nicolas Kiavue (1)  
416 Aymeric Lanore (1)  
417 Aurélie Le Gal (1)  
418 Julia Nguyen Van Thang (1)  
419  
420 Department of Microbiology and Innovative Biomarkers Platform  
421 Coralie Favier (1)  
422 Jean Louis Gaillard, MD, PhD (1,2,5)  
423 Elyanne Gault, MD, PhD (1,2,5)  
424 Jean-Louis Herrmann, PharmD, PhD (1,2,5)  
425 Christine Lawrence, PharmD (1)  
426 Virginie Lebidois, PharmD (1)  
427 Latifa Noussair, MD (1)  
428 Martin Rottman, MD, PhD (1,2,5)  
429 Anne-Laure Roux, PharmD, PhD (1,2,5)  
430 Sophie Tocqueville (1)  
431 Marie-Anne Welti, MD, PhD (1,2,5)  
432 And the nonmedical staff of the Department  
433  
434 Department of Laboratory Medicine and Pharmacology



435 Jean Claude Alvarez, MD, PhD (1,2,5)  
 436 Mehdi Djebrani, PharmD (1)  
 437 Pierre-Alexandre Emmanuelli (1)  
 438 Firas Jabbour, PharmD (1)  
 439 Lotfi Lahjomri, MD (1)  
 440 Mathilde Parent, MD (1)  
 441 And the nonmedical staff of the Department  
 442

#### 443 Department of Radiology

444 Amine Ammar, MD (1)  
 445 Najete Berradja, MD (1)  
 446 Robert-Yves Carlier, MD, MS (1,2,7,14)  
 447 Annaelle Chetrit, MD (1,2)  
 448 Caroline Diffre, MD (1,2)  
 449 Myriam Edjlali, MD, PhD (1,15)  
 450 Zaki El Baz, MD (1,14)  
 451 Adrien Felter, MD (1)  
 452 Catherine Girardot, MD (1,13)  
 453 Ahmed Mekki, MD, MS (1,2)  
 454 Dominique Mompont, MD (1)  
 455 Dominique Safa, MD (1)  
 456 Tristan Thiry, MD (1)  
 457

#### 458 Department of Radiology Interns

459 Margot Armani (1)  
 460 Olivier de Barry (1)  
 461 Antoine Kirchner (1)  
 462 Jeffery Zhou (1)  
 463

#### 464 Department of Forensic Medicine

465 Geoffroy Lorin de La Grandmaison MD, PhD (1)  
 466

#### 467 Department of Forensic Medicine Intern

468 Kevin Mahe (1)  
 469

#### 470 **Affiliations**

- 471 1. Hôpital Raymond Poincaré, GHU APHP, Université Paris Saclay, Garches, France
- 472 2. Faculté Simone Veil Santé, Université Versailles Saint Quentin en Yvelines, Université Paris
- 473 Saclay, Montigny-le-Bretonneux, France
- 474 3. Hôpital Foch, Suresnes, France
- 475 4. Centre Hospitalier Universitaire de Nantes, Nantes, France
- 476 5. Université de Versailles Saint-Quentin-en-Yvelines/INSERM, Laboratory of Infection &
- 477 Inflammation–U-1173, Montigny-le-Bretonneux, France
- 478 6. Université de Versailles Saint-Quentin-en-Yvelines/INSERM, Centre d’Evaluation et de
- 479 Traitement de la Douleur–U-987, Boulogne-Billancourt, France

7. Université de Versailles Saint-Quentin-en-Yvelines/INSERM, Handicap Neuromusculaire–U-1179, Montigny-le-Bretonneux, France
8. Centre d’Investigation Clinique, Garches, France
9. Commissariat à l’Energie Atomique, CEA Paris Saclay, Gif-sur-Yvette, France
10. Fondation Garches, Garches, France
11. Clinique Jouvenet, Ramsay Santé, Paris, France
12. Clinique de la Muette, Ramsay Santé, Paris, France
13. Polyclinique Mantaïse, Mantes-La-Jolie, France
14. Centre Hospitalier Intercommunal Poissy/Saint-Germain, GHT Yvelines Nord, Poissy, France
15. IMA-BRAIN/INSERM–UMR-1266, DHU-Neurovasc, Centre Hospitalier Sainte-Anne, Paris, France

## **References:**

- [1] Gautret P, Lagier J-C, Parola P, Hoang VT, Meddeb L, Sevestre J, et al. Clinical and microbiological effect of a combination of hydroxychloroquine and azithromycin in 80 COVID-19 patients with at least a six-day follow up: A pilot observational study. Travel Med Infect Dis 2020:101663. doi:10.1016/j.tmaid.2020.101663.
- [2] Gautret P, Lagier J-C, Parola P, Hoang VT, Meddeb L, Mailhe M, et al. Hydroxychloroquine and azithromycin as a treatment of COVID-19: results of an open-label non-randomized clinical trial. Int J Antimicrob Agents 2020:105949. doi:10.1016/j.ijantimicag.2020.105949.
- [3] Million M, Lagier J-C, Gautret P, Colson P, Fournier P-E, Amrane S, et al. Early treatment of 1061 COVID-19 patients with hydroxychloroquine and azithromycin, Marseille, France. n.d.
- [4] Mahevas M, Tran V-T, Roumier M, Chabrol A, Paule R, Guillaud C, et al. No evidence of clinical efficacy of hydroxychloroquine in patients hospitalized for COVID-19 infection with oxygen requirement: results of a study using routinely

- 508 collected data to emulate a target trial. MedRxiv 2020:2020.04.10.20060699.  
509 doi:10.1101/2020.04.10.20060699.
- 510 [5] Magagnoli J, Narendran S, Pereira F, Cummings T, Hardin JW, Sutton SS, et  
511 al. Outcomes of hydroxychloroquine usage in United States veterans  
512 hospitalized with Covid-19. MedRxiv 2020:2020.04.16.20065920.  
513 doi:10.1101/2020.04.16.20065920.
- 514 [6] Barbosa Esper R, Souza da Silva R, Teiichi Costa Oikawa F, Machado Castro  
515 M, Razuk-Filho A, Benedito Batista Junior P, et al. Empirical treatment with  
516 hydroxychloroquine and azithromycin for suspected cases of COVID-19  
517 followed-up by telemedicine. n.d.
- 518 [7] Zhou F, Yu T, Du R, Fan G, Liu Y, Liu Z, et al. Clinical course and risk factors  
519 for mortality of adult inpatients with COVID-19 in Wuhan, China: a retrospective  
520 cohort study. Lancet (London, England) 2020;395:1054–62.  
521 doi:10.1016/S0140-6736(20)30566-3.
- 522 [8] Huang C, Wang Y, Li X, Ren L, Zhao J, Hu Y, et al. Clinical features of patients  
523 infected with 2019 novel coronavirus in Wuhan, China. Lancet (London,  
524 England) 2020;395:497–506. doi:10.1016/S0140-6736(20)30183-5.
- 525 [9] Zhao M. Cytokine storm and immunomodulatory therapy in COVID-19: Role of  
526 chloroquine and anti-IL-6 monoclonal antibodies. Int J Antimicrob Agents  
527 2020:105982. doi:10.1016/j.ijantimicag.2020.105982.
- 528 [10] E T, I N-S, I E, E K, TN S, M P, et al. Hematological Findings and  
529 Complications of COVID-19. Am J Hematol 2020. doi:10.1002/AJH.25829.
- 530 [11] Tan L, Wang Q, Zhang D, Ding J, Huang Q, Tang Y-Q, et al. Lymphopenia

predicts disease severity of COVID-19: a descriptive and predictive study.

Signal Transduct Target Ther 2020;5:33. doi:10.1038/s41392-020-0148-4.

[12] Touret F, Gilles M, Barral K, Nougairède A, Decroly E, Lamballerie X de, et al.

In vitro screening of a FDA approved chemical library reveals potential

inhibitors of SARS-CoV-2 replication. BioRxiv 2020:2020.04.03.023846.

doi:10.1101/2020.04.03.023846.

[13] DH T, R S, T H, S S, Y N, A S, et al. Azithromycin, a 15-membered Macrolide

Antibiotic, Inhibits Influenza A(H1N1)pdm09 Virus Infection by Interfering With

Virus Internalization Process. J Antibiot (Tokyo) 2019;72. doi:10.1038/S41429-

019-0204-X.

[14] LB B, TW G, DT M, S B, A B, AM F, et al. Early Administration of Azithromycin

and Prevention of Severe Lower Respiratory Tract Illnesses in Preschool

Children With a History of Such Illnesses: A Randomized Clinical Trial. JAMA

2015;314. doi:10.1001/JAMA.2015.13896.

[15] Borba MGS, Val FFA, Sampaio VS, Alexandre MAA, Melo GC, Brito M, et al.

Effect of High vs Low Doses of Chloroquine Diphosphate as Adjunctive

Therapy for Patients Hospitalized With Severe Acute Respiratory Syndrome

Coronavirus 2 (SARS-CoV-2) Infection. JAMA Netw Open 2020;3:e208857.

doi:10.1001/jamanetworkopen.2020.8857.

[16] Guan W, Ni Z, Hu Y, Liang W, Ou C, He J, et al. Clinical Characteristics of

Coronavirus Disease 2019 in China. N Engl J Med 2020;382:1708–20.

doi:10.1056/NEJMoa2002032.

[17] Cao B, Wang Y, Wen D, Liu W, Wang J, Fan G, et al. A Trial of Lopinavir–

554           Ritonavir in Adults Hospitalized with Severe Covid-19. N Engl J Med

555           2020:NEJMoa2001282. doi:10.1056/NEJMoa2001282.

556

557

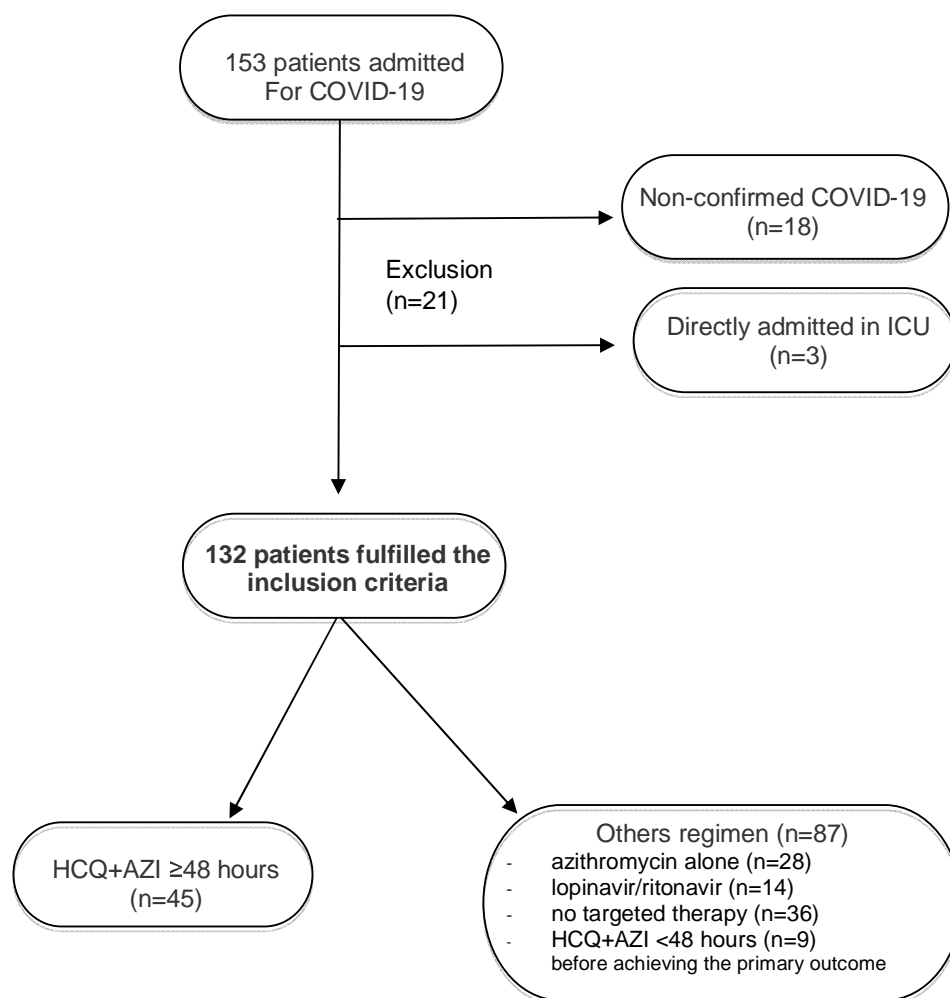

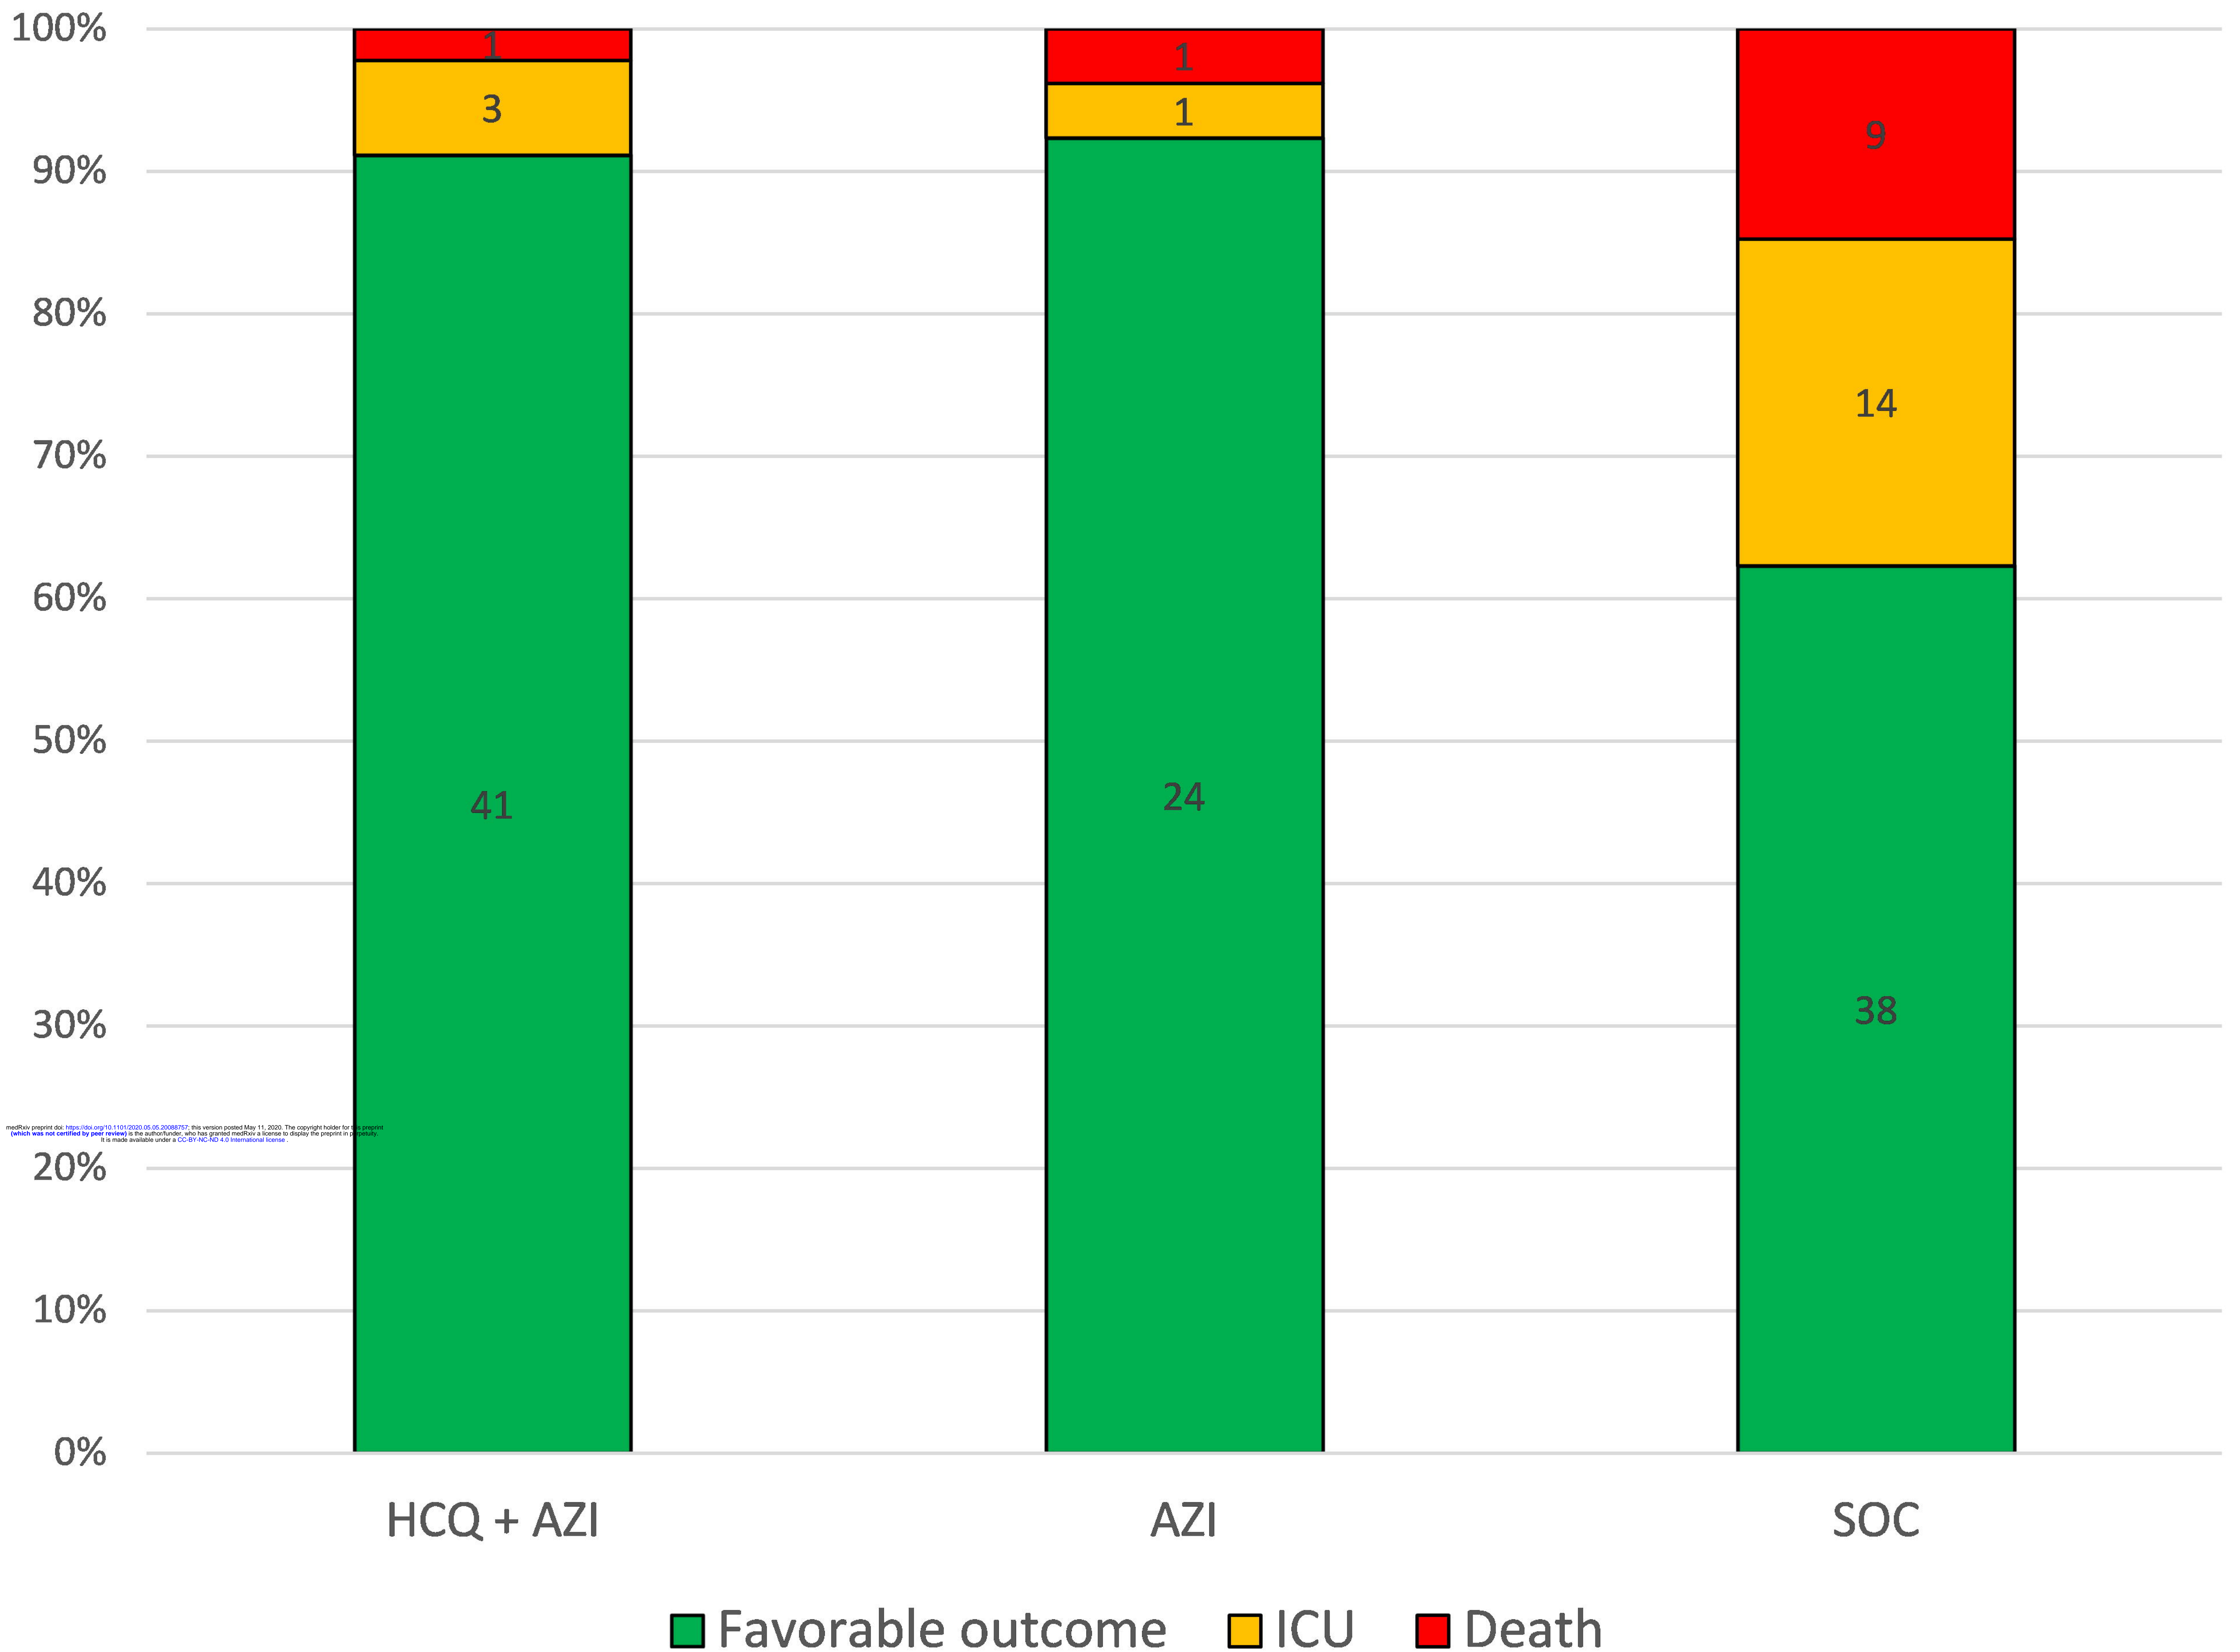

**Table 1:** Demographic and clinical characteristics at baseline

| Variables                                                                                    | HQC+AZI ≥ 48h<br>(n=45) | Others regimen*<br>(n=87) | p-value<br>(α=0.05) |
|----------------------------------------------------------------------------------------------|-------------------------|---------------------------|---------------------|
| <b>Demographic data</b>                                                                      |                         |                           |                     |
| Age, mean ± SD                                                                               | 58 ± 17                 | 59 ± 16                   | 0.74                |
| Male sex – no (%)                                                                            | 31 (68.9)               | 55 (63.2)                 | 0.65                |
| Patients with a Charlson Comorbidity Index (CCI) ≥ 5**, no (%)                               | 7 (15.5)                | 23 (25.9)                 | 0.23                |
| Comorbidities - no (%)                                                                       |                         |                           |                     |
| - Cardiovascular disease (incl. HBP)                                                         | 17 (37.8)               | 40 (46.0)                 | 0.47                |
| - Chronic respiratory disease (incl. COPD)                                                   | 8 (17.8)                | 14 (16.1)                 | 0.99                |
| - Diabetes                                                                                   | 7 (15.5)                | 18 (20.7)                 | 0.63                |
| - Chronic kidney failure                                                                     | 1 (2.2)                 | 3 (3.4)                   | 0.88                |
| - Chronic liver disease (≥ Child-Pugh B)                                                     | 0                       | 1 (1.2)                   | 0.73                |
| - Immunodepression                                                                           | 4 (8.9)                 | 7 (8.0)                   | 0.86                |
| - Obesity (BMI > 30 kg/m <sup>2</sup> )                                                      | 8 (17.8)                | 6 (6.9)                   | 0.1                 |
| <b>COVID-19 data</b>                                                                         |                         |                           |                     |
| Median delay from onset of symptoms until admission, (IQR) in days                           | 8 (6-11)                | 7 (4-8)                   | 0.005               |
| Median delay between initiation of therapeutic strategy and onset of symptoms, (IQR) in days | 9 (6-12)                | 7 (6-9)                   | 0.04                |
| PCR COVID-19 positive – no (%)                                                               | 43 (95.5)               | 83 (95.5)                 | 0.99                |
| Oxygen flow at admission, median (IQR) – L/min                                               | 2 (2-4)                 | 2 (0-3)                   | 0.001               |
| <b>Thoracic imaging</b>                                                                      |                         |                           |                     |
| Patients with a lung CT scan – no (%)                                                        | 44 (97.8)               | 59 (67.8)                 | 0.0002              |
| Normal CT scan – no (%)                                                                      | 1 (2.3)                 | 3 (5.1)                   | 0.83                |
| Limited extend on CT scan <10%                                                               | 7 (15.9)                | 9 (15.3)                  | 0.85                |
| Mild extend on CT scan 10-25%                                                                | 11 (25)                 | 16 (27.1)                 | 0.99                |
| Moderate extend on CT scan 25-50%                                                            | 19 (43.2)               | 24 (40.7)                 | 0.96                |
| Severe extend on CT scan 50-75%                                                              | 6 (13.7)                | 6 (10.2)                  | 0.81                |
| Critical extend on CT scan >75%                                                              | 0                       | 1 (1.7)                   | 0.88                |
| <b>Biological tests</b>                                                                      |                         |                           |                     |
| Median lymphocyte count (IQR) - /mm <sup>3</sup>                                             | 920 (710-1160)          | 1065 (745-1530)           | 0.16                |
| Median C-reactive protein (CRP) (IQR) – mg/L                                                 | 90.5 (55-152)           | 62 (14-106)               | 0.008               |

\*Others regimen include azithromycin (n=28), lopinavir/ritonavir (n=14) or no targeted therapy (n=36) and 9 individuals treated with HCQ plus azithromycin for less than 48 hours before transfer to ICU and/or death

\*\*Patients with a CCI scores ≥5 are considered as severe and fragile.

Abbreviations: BMI, body mass index; COPD, chronic obstructive pulmonary disease; HBP, high blood pressure



**Table 2:** Risk-factors and clinical outcome of COVID-19 hospitalized patients. Variables are compared using Chi-square test with Yates' correction. Odds ratio (OR) were obtained using Baptista-Pikes method. Multiple logistic regression was performed to calculate a r correlation factor using Pearson test.

| Variables                                                                            | Favorable outcome n (%) | ICU or death n (%) | Univariate analysis               |         | Multivariate analysis            |         |
|--------------------------------------------------------------------------------------|-------------------------|--------------------|-----------------------------------|---------|----------------------------------|---------|
|                                                                                      |                         |                    | OR (95% CI) for favorable outcome | p-value | r (95% CI) for favorable outcome | p-value |
| Baseline characteristics                                                             |                         |                    |                                   |         |                                  |         |
| Age, mean ± SD                                                                       | 57 ± 1.6                | 64 ± 2.8           | -                                 | 0.05    | -0.32 to 0.011                   | 0.067   |
| Gender (% male)                                                                      | 68 (66)                 | 18 (62)            | -                                 | 0.82    | -                                | -       |
| Median delay between onset of symptoms and admission, (IQR) in days                  | 7 (4-10)                | 6 (5-9)            | -                                 | 0.31    | -0.11 to 0.22                    | 0.52    |
| Median delay between initiation of therapeutics and onset of symptoms, (IQR) in days | 8.5 (6-10)              | 7 (6-10)           | -                                 | 0.29    | -0.09 to 0.3                     | 0.27    |
| Median oxygen flow at admission (IQR) - L/min                                        | 2 (0-3)                 | 3 (2-4)            | -                                 | 0.003   | -0.48 to -0.17                   | <0.0001 |
| CT scan lung affected > 50%                                                          |                         |                    |                                   |         |                                  |         |
| Yes                                                                                  | 10 (76.9)               | 3 (23.1)           |                                   |         |                                  |         |
| No                                                                                   | 76 (84.5)               | 14 (15.5)          | 1.62 (0.43 to 6)                  | 0.78    | -                                | -       |
| Median lymphocyte count at admission (IQR) - /mm <sup>3</sup>                        | 1110 (780-1450)         | 810 (700-955)      | -                                 | 0.0005  | 0.1 to 0.42                      | 0.002   |
| Median CRP count at admission (IQR) - mg/L                                           | 62 (16-112.5)           | 112 (82-161.5)     | -                                 | 0.001   | -0.42 to -0.1                    | 0.002   |
| Charlson Comorbidity Index (CCI)**                                                   |                         |                    |                                   |         |                                  |         |
| CCI <5                                                                               | 81 (79.4)               | 21 (20.6)          |                                   |         |                                  |         |
| CCI ≥5                                                                               | 22 (73.3)               | 8 (26.7)           | 0.7 (0.27 to 1.82)                | 0.65    | -                                | -       |
| Obesity (BMI> 30 kg/m <sup>2</sup> )                                                 |                         |                    |                                   |         |                                  |         |
| Yes                                                                                  | 13 (92.8)               | 1 (7.2)            |                                   |         |                                  |         |
| No                                                                                   | 90 (76.3)               | 28 (23.7)          | 0.25 (0.02 to 1.46)               | 0.28    | -0.04 to 0.29                    | 0.15    |
| Therapeutic data                                                                     |                         |                    |                                   |         |                                  |         |
| HCQ + azithromycin ≥ 48 hours                                                        | 41 (91.1)               | 4 (8.9)            | 6.2 (2.1 to 17.6)                 | 0.002   | 0.06 to 0.38                     | 0.009   |
| Azithromycin ≥ 48 hours                                                              | 24 (92.3)               | 2 (7.7)            | 7.2 (1.76 to 33.0)                | 0.01    | -0.0001 to 0.33                  | 0.05    |
| Standard of care*                                                                    | 38 (62.3)               | 23 (37.7)          | 1                                 | -       | 1                                | -       |
| Total                                                                                | 103                     | 29                 | -                                 |         |                                  |         |

\*standard of care includes no targeted therapy, or lopinavir/r or treatment received <48h until unfavorable outcome (transfer to ICU or death)

\*\* Patients with CCI scores  $\geq$ 5 are considered as severe and fragile

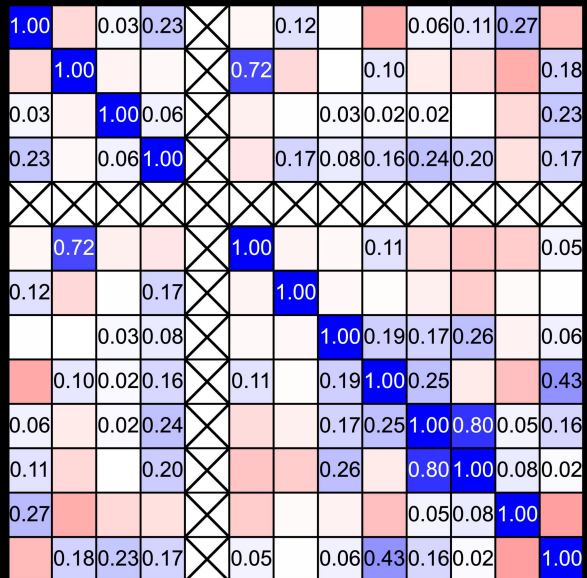

Source: https://www.medrxiv.org/content/10.1101/2020.05.05.20088757v1.full.pdf
